# Supplementary material for: EcoFloras Elucidate Insights from Biodiversity Data: Evaluating the Strengths and Limitations of iNaturalist Observations and Herbarium Specimens
Source: Preprints.org preprint supplement (doi:10.20944/preprints202410.0017.v1), 2024-10-01
Supplement: Supplementary file 2 [file supplementary]

| **Category** | **Species** | **Garden** | **iNaturalist observations** | **Herbarium specimens pre-2000** | **Herbarium specimens post-2000** |
| --- | --- | --- | --- | --- | --- |
| **Rare Plant Wrangling** | *Asclepias viridiflora Raf.* | New York | 315 | 23 | 0 |
|  | *Tillandsia utriculata L.* | Marie Selby | 407 | 8 | 2 |
|  | Abutilon parishii S.Watson | Desert | 6 | 3 | 1 |
|  | *Physaria bellii G.A.Mulligan* | Denver | 34 | 34 | 5 |
|  | Cirsium pitcheri Torr. & A. Gray | Chicago | 61 | 6 | 0 |
|  |  |  |  |  |  |
| **Finding Hay in a Haystack** | Phytolacca americana L. | New York | 4,421 | 14 | 12 |
|  | Sabal palmetto (Walter) Lodd. ex Schult. & Schult.f. | Marie Selby | 590 | 1 | 2 |
|  | Carnegiea gigantea (Engelm.) Britton & Rose | Desert | 7,477 | 31 | 33 |
|  | Ericameria nauseosa (Pursh) G.L.Nesom & G.I.Baird | Denver | 1,220 | 63 | 38 |
|  | Mertensia virginica (L.) Pers. ex Link | Chicago | 1051 | 16 | 0 |
|  |  |  |  |  |  |
| **Pokey Plant Problems** | Opuntia humifusa (Raf.) Raf. | New York | 182 | 0 | 2 |
|  | Cirsium nuttallii DC. | Marie Selby | 83 | 3 | 0 |
|  | Cylindropuntia acanthocarpa (Engelm. & J.M.Bigelow) F.M.Knuth | Desert | 726 | 66 | 85 |
|  | Cirsium undulatum Spreng. | Denver | 331 | 27 | 4 |
|  | Cirsium discolor (Muhl. ex Willd.) Spreng. | Chicago | 226 | 28 | 8 |
|  |  |  |  |  |  |
| **Emerging Invasives** | Arum italicum Mill. | New York | 1028 | 0 | 3 |
|  | Asparagus aethiopicus L. | Marie Selby | 25 | 0 | 1 |
|  | Oncosiphon pilulifer (L.f.) Källersjö | Desert | 1546 | 1 | 63 |
|  | Alliaria petiolata (M.Bieb.) Cavara & Grande | Denver | 99 | 0 | 2 |
|  | Ranunculus ficaria L. | Chicago | 939 | 1 | 0 |
|  |  |  |  |  |  |
| **Cultivated Curation** | Aquilegia chrysantha A. Gray | Denver | 45 (cultivated); 1 (wild) | 4 | 2 |
|  | Chilopsis linearis (Cav.) Sweet | Desert | 257 (cultivated); 66 (wild) | 15 | 18 |
